# Supplementary material for: Monitoring SARS-CoV-2 in wastewater during New York City’s second wave of COVID-19: Sewershed-level trends and relationships to publicly available clinical testing data
Source: bioRxiv or medRxiv preprint supplement (doi:10.1101/2022.02.08.22270666), 2022-02-08
Supplement: Supplementary file [file media-1.pdf]

1 **Supplementary Material for**

2

3 **Monitoring SARS-CoV-2 in wastewater during New York City's second wave of COVID-**  
4 **19: Sewershed-level trends and relationships to publicly available clinical testing data**

5 Catherine Hoar,<sup>a</sup> Francoise Chauvin,<sup>b</sup> Alexander Clare,<sup>b</sup> Hope McGibbon,<sup>b</sup> Esmeraldo Castro,<sup>b</sup>  
6 Samantha Patinella,<sup>b</sup> Dimitrios Katehis,<sup>b</sup> John J. Dennehy,<sup>c,d</sup> Monica Trujillo,<sup>e</sup> Davida S.  
7 Smyth,<sup>f,g</sup> Andrea I. Silverman<sup>a\*</sup>

8

9 <sup>a</sup>Department of Civil and Urban Engineering, New York University Tandon School of  
10 Engineering Brooklyn, NY, USA

11 <sup>b</sup>New York City Department of Environmental Protection, New York, NY, USA

12 <sup>c</sup>Biology Department, Queens College, The City University of New York, Queens, NY USA

13 <sup>d</sup>Biology Doctoral Program, The Graduate Center, The City University of New York, New York,  
14 NY, USA

15 <sup>e</sup>Department of Biology, Queensborough Community College, The City University of New  
16 York, Bayside, NY, USA

17 <sup>f</sup>Department of Natural Sciences and Mathematics, Eugene Lang College of Liberal Arts at The  
18 New School, New York, NY, USA

19 <sup>g</sup>present affiliation: Department of Life Sciences, Texas A&M University San Antonio, San  
20 Antonio, Texas, USA

21

22 \*corresponding author: Andrea Silverman, [andrea.silverman@nyu.edu](mailto:andrea.silverman@nyu.edu)

23

24 **Table of Contents**

25 Table S.1. New York City’s 14 wastewater resource recovery facilities (WRRFs) S3

26 **Sample Processing and RNA Extraction Methodology** S4

27 **RT-qPCR Assays** S6

28 *SARS-CoV-2 N1 Assay* S6

29 Table S.2. MIQE checklist: Essential and desirable information for the SARS-CoV-2 N1 target  
30 RT-qPCR assay<sup>7</sup> S8

|    |                                                                                                        |     |
|----|--------------------------------------------------------------------------------------------------------|-----|
| 31 | Figure S.1. SARS-CoV-2 viral loads in wastewater from the Wards Island facility calculated             |     |
| 32 | using (a) the individual standard curves associated with the RT-qPCR plate on which each               |     |
| 33 | sample was run and (b) the pooled standard curve.                                                      | S13 |
| 34 | <i>BCoV Assay</i>                                                                                      | S13 |
| 35 | <b>Publicly Available Clinical COVID-19 Data and Hospitalization Data</b>                              | S15 |
| 36 | Figure S.2. Summary of COVID-19 testing data (molecular tests) for each sewershed in New               |     |
| 37 | York City.                                                                                             | S16 |
| 38 | Figure S.3. Summary of 7-day averages of new cases (solid red line) and hospitalizations               |     |
| 39 | (dashed black line) normalized by borough population for each New York City borough for                |     |
| 40 | the study period.                                                                                      | S17 |
| 41 | <b>Sewershed-level Spearman's Rank Correlation Coefficients</b>                                        | S18 |
| 42 | Table S.3. Spearman's rank correlation coefficients ( $\rho$ ) between SARS-CoV-2 wastewater           |     |
| 43 | data and clinical COVID-19 case data for each sewershed in New York City.                              | S18 |
| 44 | <b>Time Lag Analysis</b>                                                                               | S19 |
| 45 | Figure S.4. Spearman rank correlation coefficients ( $\rho$ ) between SARS-CoV-2 viral loads (N1       |     |
| 46 | GC/day) and 7-day averages of new COVID-19 cases/day, with a time lag ( $\tau$ ) between 0 and         |     |
| 47 | 21 days for each sewershed in New York City.                                                           | S20 |
| 48 | <b>Linear Regression Analysis</b>                                                                      | S21 |
| 49 | Figure S.5. Linear regression of $\log_{10}$ -transformed flow-normalized SARS-CoV-2 viral loads       |     |
| 50 | in wastewater (N1 GC/day) and $\log_{10}$ -transformed 7-day averages of new COVID-19                  |     |
| 51 | cases/day for the combined data set without the data filtered based on potentially inadequate          |     |
| 52 | testing.                                                                                               | S21 |
| 53 | <b>Estimation of Minimum Detectable Case Rates</b>                                                     | S22 |
| 54 | Table S.4. Estimated minimum detectable case rates (new COVID-19 cases/day/100,000)                    |     |
| 55 | associated with method LOD for quantification of the SARS-CoV-2 N1 gene target in                      |     |
| 56 | wastewater (4,500 N1 GC/L) for each sewershed.                                                         | S23 |
| 57 | Figure S.6. Estimation of new COVID-19 cases/day associated with the method LOD for                    |     |
| 58 | quantification of the SARS-CoV-2 N1 gene target in wastewater, based on the linear                     |     |
| 59 | regression of $\log_{10}$ -transformed SARS-CoV-2 viral loads (N1 GC/day) and $\log_{10}$ -transformed |     |
| 60 | 7-day averages of new COVID-19 cases/day for the combined data set (modified from Figure               |     |
| 61 | 3.a).                                                                                                  | S24 |
| 62 | <b>References</b>                                                                                      | S25 |
| 63 |                                                                                                        |     |
| 64 |                                                                                                        |     |
| 65 |                                                                                                        |     |

66  
67

**Table S.1. New York City’s 14 wastewater resource recovery facilities (WRRFs)**

| <b>Wastewater Resource Recovery Facility (WRRF)</b> | <b>Borough(s)</b>      | <b>Population Served*</b> | <b>Daily Flow Range (Average)<sup>†</sup> in MGD</b> |
|-----------------------------------------------------|------------------------|---------------------------|------------------------------------------------------|
| Hunts Point                                         | Bronx                  | 755,948                   | 115 - 215 (136)                                      |
| Wards Island                                        | Bronx and Manhattan    | 1,201,485                 | 143 - 273 (180)                                      |
| North River                                         | Manhattan              | 658,596                   | 81 - 143 (94)                                        |
| Newtown Creek                                       | Manhattan and Brooklyn | 1,156,473                 | 158 - 296 (188)                                      |
| Red Hook                                            | Brooklyn               | 224,029                   | 21 - 46 (26)                                         |
| Owls Head                                           | Brooklyn               | 906,442                   | 81 - 159 (95)                                        |
| Coney Island                                        | Brooklyn               | 682,342                   | 70 - 102 (82)                                        |
| 26th Ward                                           | Brooklyn               | 290,608                   | 44 - 89 (55)                                         |
| Rockaway                                            | Queens                 | 120,539                   | 18 - 25 (20)                                         |
| Jamaica Bay                                         | Queens                 | 748,737                   | 74 - 103 (81)                                        |
| Tallman Island                                      | Queens                 | 449,907                   | 48 - 90 (59)                                         |
| Bowery Bay                                          | Queens                 | 924,695                   | 82 - 179 (100)                                       |
| Port Richmond                                       | Staten Island          | 226,167                   | 23 - 55 (29)                                         |
| Oakwood Beach                                       | Staten Island          | 258,731                   | 24 - 41 (28)                                         |

68 \*Based on inter-census population estimates for 2020 from the New York Metropolitan  
69 Transportation Council’s 2050 Socioeconomic and Demographic Forecast<sup>1</sup>

70 <sup>†</sup>Average ( $Q_{avg}$ ) is based on daily flows from November 8, 2020 to April 11, 2021

71  
72

### 73 **Sample Processing and RNA Extraction Methodology**

74 Influent wastewater samples were analyzed in 40-mL aliquots using polyethylene glycol (PEG)  
75 precipitation for virus concentration. To ensure inactivation of viruses before sample  
76 concentration, samples were first pasteurized at 60 °C in a water bath for a total of 90 min, which  
77 allowed 30 min for the sample to reach 60 °C and then 60 min of incubation at that temperature.  
78 Pasteurized samples were cooled in a room temperature water bath for 10 min followed by a 10  
79 min incubation on ice prior to addition of an attenuated bovine coronavirus (BCoV) from a  
80 bovine rota-coronavirus vaccine (Calf-Guard®; Zoetis #4002), which was used as a process  
81 control. The BCoV control spike was prepared based on a method modified from Feng et al.,  
82 2021.<sup>2</sup> One one-dose vial of the Calf-Guard® vaccine was rehydrated with 1 mL TE buffer  
83 (Fisher Scientific, BP2473100) and stored in single-use aliquots at -80 °C. On the day of sample  
84 analysis, an aliquot of the vaccine was thawed at room temperature and further diluted 1 in 10  
85 using nuclease-free water. 40 µL of the diluted vaccine was added to each 40-mL sample. This  
86 spike was added after pasteurization and cooling based on preliminary analysis during protocol  
87 development that indicated reduced recovery of BCoV when it was added to the sample prior to  
88 the pasteurization step. On the contrary, we found pasteurization to increase the measured  
89 concentration of the N1 target in our samples, as compared to samples analyzed without the  
90 initial pasteurization step (data not shown).

91

92 Solids were then removed from samples through centrifugation at 5000 x g for 10 min at 4 °C  
93 (Eppendorf Centrifuge 5804 R or Thermo Fisher Scientific Sorvall X4 Pro Centrifuge). Sample  
94 supernatant was filtered using 0.22 µm cellulose acetate filters (Corning, 431154). It should be  
95 noted that due to brief challenges in obtaining some consumables during the fall of 2020 due to  
96 supply chain constraints, alternative filters were used for some batches of samples—namely, (1)  
97 0.45 µm cellulose nitrate filters (Thermo Scientific Nalgene, 130-4045PK) for samples collected  
98 on October 4, 6, and 18, 2020 and (2) 0.22 µm polyethersulfone (Millex-GP, SLGP033RS) for  
99 samples collected on November 1, 3, 8, and 10, 2020. A preliminary study indicated that filter  
100 type and size may impact virus recovery, so if filters must be used, consistency of filter type and  
101 size is preferable.

102

103 The utility of including the filtration step for sample processing and SARS-CoV-2 virus  
104 extraction depends on downstream analysis goals. For example, if extracted RNA will be used  
105 for sequencing applications, sample filtration can aid in removing bacterial cells and their nucleic  
106 acids, thereby helping to enrich for viral RNA. Preliminary work during protocol development  
107 indicated no significant difference between SARS-CoV-2 N1 gene copy concentrations in  
108 samples analyzed with and without filtration with 0.22 µm cellulose acetate filters (data not  
109 shown). Nonetheless, despite similar viral recoveries with and without filtration, we chose to  
110 include the filtration step given logistical benefits, including the prevention of clogging of  
111 membranes used in spin-column based RNA extraction methods, and ensuring that no solids  
112 were carried over after the centrifugation step. Avoiding the transfer of solids could potentially  
113 reduce variability caused by the inclusion of viruses associated with solid material, although  
114 further analysis is needed to better understand the distribution of the virus in liquid and solid  
115 fractions of wastewater samples and the impact of pasteurization on virus partitioning between  
116 these two phases.

117

118 To concentrate viruses in solution, filtered samples were added to 4.0 g of PEG (Fisher  
119 Scientific, BP233) and 0.9 g of NaCl (Fisher Scientific, BP358) in 50-mL Oak Ridge high-speed  
120 polypropylene copolymer centrifuge tubes (Thermo Scientific Nalgene, 3119-0050), shaken by  
121 hand until translucent, and held at 4 °C overnight. Note that 50-mL Oak Ridge high-speed  
122 polycarbonate centrifuge tubes (Thermo Scientific Nalgene, 3138-0050) were initially used for  
123 sample processing; however, these tubes broke after several uses, possibly due to the  
124 polycarbonate's limited resistance to chemicals used in the RNA extraction (see below). The  
125 next day, samples were centrifuged at 12,000 x g for 120 min at 4 °C (Eppendorf Centrifuge  
126 5804 R or Thermo Fisher Scientific Sorvall X4 Pro Centrifuge) to pellet the PEG and associated  
127 virus particles.

128

129 RNA was extracted from concentrated PEG pellets using the Qiagen QIAamp Viral RNA Mini  
130 Kit (Qiagen, 52906; ethanol purchased separately, Fisher Scientific, BP2818500) following the  
131 vacuum protocol with a QIAvac 24 Plus (Qiagen, 19413), with the modifications specified here.  
132 First, 1.6x the suggested lysis buffer volume (i.e., 1.7 mL) was added directly to the PEG pellet  
133 in the Oak Ridge polycarbonate tube in which it was centrifuged to ensure recovery of the entire

134 pellet. Note that samples processed prior to February 1, 2021 were extracted with 3x the  
135 suggested lysis buffer volume, originally used in an effort to maximize PEG pellet recovery. A  
136 subsequent study confirmed no significant difference in recovery using either 1.6x or 3x the  
137 suggested lysis buffer volume (data not shown). RNA was eluted in 60  $\mu$ L of kit-supplied AVE  
138 buffer through a series of two 30  $\mu$ L-elutions (Eppendorf Centrifuge 5424 R) and stored in  
139 aliquots at -80  $^{\circ}$ C until quantification by RT-qPCR.

140

## 141 **RT-qPCR Assays**

### 142 ***SARS-CoV-2 N1 Assay***

143 A one-step RT-qPCR assay based on the CDC Diagnostic Panel was used to quantify gene  
144 copies of the N1 region of the SARS-CoV-2 (GenBank accession no. MN908947) nucleocapsid  
145 (N) gene [72-base amplicon, 28287 (starting position) - 28358 (ending position)].<sup>3-5</sup> Triplicate 20  
146  $\mu$ L reactions each contained 5  $\mu$ L of 4x TaqPath 1-Step RT-qPCR Master Mix (Thermo Fisher  
147 Scientific, A15299); 1.5  $\mu$ L of the 2019-nCoV RUO Kit primer/probe mix (Integrated DNA  
148 Technologies, 10006713) containing 6.7  $\mu$ M forward primer (5'-  
149 GACCCCAAATCAGCGAAAT-3'), 6.7  $\mu$ M reverse primer (5'-  
150 TCTGGTTACTGCCAGTTGAATCTG-3'), and 1.7  $\mu$ M probe (5'-FAM-  
151 ACCCCGCATTACGTTTGGTGGACC-BHQ-1-3'); 5  $\mu$ L of template RNA; and 8.5  $\mu$ L of  
152 nuclease-free water. Note that initial 2019-nCoV RUO Kits contained probes synthesized with  
153 Black Hole Quencher 1 (BHQ-1), while later kits contained probes synthesized with  
154 Zen/IowaBlack quenchers, according to correspondence with Integrated DNA Technologies.  
155 Thus, RT-qPCR conducted later in the study period used probes with Zen/IowaBlack quenchers.  
156 Data provided by the CDC for the limit of detection equivalence between probes with the two  
157 quencher types showed that the lowest detectable concentration at which all replicates were  
158 positive was the same for the two quencher types when using TaqPath 1-Step RT-qPCR Master  
159 Mix.<sup>4</sup>

160

161 Each 96-well RT-qPCR plate included triplicate no template controls (nuclease-free water).  
162 Synthetic SARS-CoV-2 RNA covering > 99.9% of the viral genome (Twist Bioscience Control  
163 1, GENBANK ID MT007544.1; Twist Bioscience, 102019) served as both a positive control and

164 standard used in a decimal serial dilution for quantification of N1 gene copies. Standard  
165 concentrations used for quantification ranged from  $5 \times 10^5$  copies/rxn (equivalent to  $1.5 \times 10^8$   
166 copies/L of sample) to the limit of quantification (LOQ), which was 50 copies/rxn (equivalent to  
167  $1.5 \times 10^4$  copies/L of sample). The LOQ, determined as described by Forootan et al. 2017,<sup>6</sup> was  
168 the concentration for which the coefficient of variation (CV) on concentrations of replicate  
169 standards calculated using measured C<sub>q</sub> values was  $\leq 35\%$  (CV = 34% for the LOQ in this  
170 study). Note that these concentrations are relative to the approximate concentration of synthetic  
171 RNA control reported by the manufacturer, as described in the main text.

172

173 Reactions were aliquoted manually into 0.1 mL MicroAmp™ Fast Optical 96-Well Reaction  
174 Plates (Thermo Fisher Scientific, 4346907), which were covered with MicroAmp™ Optical  
175 Adhesive Films (Thermo Fisher Scientific, 4311971). RT-qPCR analysis for the SARS-CoV-2  
176 N1 gene was conducted on a StepOnePlus Real-Time PCR System (ThermoFisher, 4376600)  
177 with the following cycling conditions: hold at 25 °C for 2 min, 50 °C for 15 min, and 95 °C for 2  
178 min, followed by 45 cycles of 95 °C for 3 sec and 55 °C for 30 sec. The MIQE checklist for  
179 reporting essential and desirable information<sup>7</sup> for the N1 assay can be found in Table S.2.

180

181 **Table S.2. MIQE checklist: Essential and desirable information for the SARS-CoV-2 N1**  
 182 **target RT-qPCR assay<sup>7</sup>**

| ITEM TO CHECK                                                        | IMPORTANCE | CHECKLIST                                 |
|----------------------------------------------------------------------|------------|-------------------------------------------|
| <b>EXPERIMENTAL DESIGN</b>                                           |            |                                           |
| Definition of experimental and control groups                        | E          | Provided in Materials and Methods         |
| Number within each group                                             | E          | Provided in Materials and Methods         |
| Assay carried out by core lab or investigator's lab?                 | D          | Assay carried out by NYC DEP lab          |
| Acknowledgement of authors' contributions                            | D          | --                                        |
| <b>SAMPLE</b>                                                        |            |                                           |
| Description                                                          | E          | Provided in Materials and Methods         |
| Volume/mass of sample processed                                      | D          | Provided in Materials and Methods         |
| Microdissection or macrodissection                                   | E          | N/A                                       |
| Processing procedure                                                 | E          | Provided in Materials and Methods         |
| If frozen - how and how quickly?                                     | E          | N/A                                       |
| If fixed - with what, how quickly?                                   | E          | N/A                                       |
| Sample storage conditions and duration (especially for FFPE samples) | E          | Provided in Materials and Methods         |
| <b>NUCLEIC ACID EXTRACTION</b>                                       |            |                                           |
| Procedure and/or instrumentation                                     | E          | Provided in Materials and Methods /SI     |
| Name of kit and details of any modifications                         | E          | Provided in Materials and Methods /SI     |
| Source of additional reagents used                                   | D          | Provided in SI                            |
| Details of DNase or RNase treatment                                  | E          | N/A                                       |
| Contamination assessment (DNA or RNA)                                | E          | Method blanks included                    |
| Nucleic acid quantification                                          | E          | RNA concentrations not routinely measured |
| Instrument and method                                                | E          | N/A                                       |
| Purity (A260/A280)                                                   | D          | N/A                                       |
| Yield                                                                | D          | N/A                                       |
| RNA integrity method/instrument                                      | E          | Not determined                            |
| RIN/RQI or Cq of 3' and 5' transcripts                               | E          | N/A                                       |
| Electrophoresis traces                                               | D          | N/A                                       |
| Inhibition testing (Cq dilutions, spike or other)                    | E          | Discussed in Results and Discussion       |
| <b>REVERSE TRANSCRIPTION</b>                                         |            |                                           |
| Complete reaction conditions                                         | E          | Provided in SI                            |
| Amount of RNA and reaction volume                                    | E          | Provided in SI                            |
| Priming oligonucleotide (if using GSP) and concentration             | E          | Provided in SI                            |
| Reverse transcriptase and concentration                              | E          | Provided in SI                            |
| Temperature and time                                                 | E          | Provided in SI                            |



**Table S.2. MIQE checklist *continued***

|                                                           |     |                                                         |
|-----------------------------------------------------------|-----|---------------------------------------------------------|
| Manufacturer of reagents and catalogue numbers            | D   | Provided in SI                                          |
| Cqs with and without RT                                   | D*  | Not determined                                          |
| Storage conditions of cDNA                                | D   | N/A (one-step RT-qPCR)                                  |
| <b>qPCR TARGET INFORMATION</b>                            |     |                                                         |
| If multiplex, efficiency and LOD of each assay.           | E   | N/A                                                     |
| Sequence accession number                                 | E   | Provided in SI                                          |
| Location of amplicon                                      | D   | Provided in SI                                          |
| Amplicon length                                           | E   | Provided in SI                                          |
| <i>In silico</i> specificity screen (BLAST, etc)          | E   | N/A                                                     |
| Pseudogenes, retropseudogenes or other homologs?          | D   | N/A                                                     |
| Sequence alignment                                        | D   | N/A                                                     |
| Secondary structure analysis of amplicon                  | D   | N/A                                                     |
| Location of each primer by exon or intron (if applicable) | E   | N/A                                                     |
| What splice variants are targeted?                        | E   | N/A                                                     |
| <b>qPCR OLIGONUCLEOTIDES</b>                              |     |                                                         |
| Primer sequences                                          | E   | Provided in SI                                          |
| RTPrimerDB Identification Number                          | D   | Not provided                                            |
| Probe sequences                                           | D** | Provided in SI                                          |
| Location and identity of any modifications                | E   | N/A                                                     |
| Manufacturer of oligonucleotides                          | D   | Provided in SI                                          |
| Purification method                                       | D   | Not provided                                            |
| <b>qPCR PROTOCOL</b>                                      |     |                                                         |
| Complete reaction conditions                              | E   | Provided in SI                                          |
| Reaction volume and amount of cDNA/DNA                    | E   | Provided SI (one-step RT-qPCR)                          |
| Primer, (probe), Mg <sup>++</sup> and dNTP concentrations | E   | Provided in SI (TaqPath™ 1-Step RT-qPCR Master Mix, CG) |
| Polymerase identity and concentration                     | E   | Provided in SI (TaqPath™ 1-Step RT-qPCR Master Mix, CG) |
| Buffer/kit identity and manufacturer                      | E   | Provided in SI (TaqPath™ 1-Step RT-qPCR Master Mix, CG) |
| Exact chemical constitution of the buffer                 | D   | Provided in SI (TaqPath™ 1-Step RT-qPCR Master Mix, CG) |
| Additives (SYBR Green I, DMSO, etc.)                      | E   | N/A                                                     |
| Manufacturer of plates/tubes and catalog number           | D   | Provided in SI                                          |
| Complete thermocycling parameters                         | E   | Provided in SI                                          |
| Reaction setup (manual/robotic)                           | D   | Provided in SI                                          |
| Manufacturer of qPCR instrument                           | E   | Provided in SI                                          |

**Table S.2. MIQE checklist *continued***

| <b>qPCR VALIDATION</b>                                   |   |                                            |
|----------------------------------------------------------|---|--------------------------------------------|
| Evidence of optimisation (from gradients)                | D | Not determined                             |
| Specificity (gel, sequence, melt, or digest)             | E | N/A                                        |
| For SYBR Green I, Cq of the NTC                          | E | N/A                                        |
| Standard curves with slope and y-intercept               | E | Provided in SI                             |
| PCR efficiency calculated from slope                     | E | Provided in SI                             |
| Confidence interval for PCR efficiency or standard error | D | Provided in SI                             |
| r <sup>2</sup> of standard curve                         | E | Provided in SI                             |
| Linear dynamic range                                     | E | Provided in SI                             |
| Cq variation at lower limit                              | E | Provided in SI                             |
| Confidence intervals throughout range                    | D | Not provided                               |
| Evidence for limit of detection                          | E | Provided in Materials and Methods          |
| If multiplex, efficiency and LOD of each assay.          | E | N/A                                        |
| <b>DATA ANALYSIS</b>                                     |   |                                            |
| qPCR analysis program (source, version)                  | E | Provided in SI                             |
| Cq method determination                                  | E | Provided in SI                             |
| Outlier identification and disposition                   | E | Provided in SI                             |
| Results of NTCs                                          | E | Provided in Materials and Methods          |
| Justification of number and choice of reference genes    | E | N/A                                        |
| Description of normalisation method                      | E | N/A                                        |
| Number and concordance of biological replicates          | D | N/A                                        |
| Number and stage (RT or qPCR) of technical replicates    | E | Provided in Materials and Methods          |
| Repeatability (intra-assay variation)                    | E | Triplicate RT-qPCR reactions (SD included) |
| Reproducibility (inter-assay variation, %CV)             | D | Not determined                             |
| Power analysis                                           | D | Not determined                             |
| Statistical methods for result significance              | E | N/A                                        |
| Software (source, version)                               | E | Provided in SI                             |
| Cq or raw data submission using RDML                     | D | Not provided                               |

183

184

185

186 Cq values were determined based on the automatic Cq threshold assigned by the StepOne™  
187 Software v2.3 (ThermoFisher). The mean and standard deviation of automatic Cq threshold  
188 across all plates were 0.30 and 0.065, respectively. Any RT-qPCR plates assigned an automatic  
189 Cq threshold more than two standard deviations above or below the mean automatic Cq  
190 threshold were designated as outlier Cq thresholds and reanalyzed with a manual Cq threshold  
191 set at 0.31, the mean Cq threshold calculated after the outlier Cq thresholds were removed.

192

193 An approximate concentration of the synthetic RNA control used for standard curve preparation  
194 was specified by the supplier. Concentrations of standards prepared from the first lot of this  
195 control purchased by the research team (referred to as the “original” lot) were determined  
196 assuming this approximate concentration. Data from nine standard curves generated with the  
197 original lot of synthetic RNA control (analyzed on different RT-qPCR plated on different days)  
198 were pooled to obtain one reference standard curve for the original lot. RNA target  
199 concentrations of subsequent lots of the synthetic RNA control were each different from that of  
200 the original lot, as evidenced by different Cq values of each point on the standard curve (data not  
201 shown). Because absolute quantification (e.g., using ddPCR) of the RNA control was not  
202 feasible at the time that sample analysis began, concentrations of subsequent lots of the RNA  
203 control were quantified using measured Cq values of the new lot of the RNA control and the  
204 pooled reference standard curve for the original lot (i.e., assuming the approximate quantity  
205 reported by the manufacturer). Note that quantification of the RNA control through digital PCR  
206 is underway, and N1 concentrations reported in the current version of this work may therefore be  
207 updated in future versions to reflect the quantified concentration of the RT-qPCR standard.

208

209 The quality assurance and quality control guidelines developed internally for the NYC DEP’s  
210 SARS-CoV-2 monitoring program established an acceptable range of amplification efficiencies  
211 between 70% and 115%. PCR amplification efficiencies for all N1 assay plates ranged between  
212 72% and 109%, with  $R^2$  values for all standard curves  $\geq 0.97$ . Of the 37 individual N1 assay  
213 plates from the study period (samples collected between November 8, 2020 and April 11, 2021),  
214 two resulted in efficiencies less than 85% and none resulted in an efficiency over 110%,  
215 indicating consistent acceptable performance of the assay over the five-month period of  
216 statistical analysis. It should be noted that variations in amplification efficiency--calculated based

217 on the slope of the standard curve--may reflect errors or inconsistencies in preparation of  
218 standards rather than changes in actual PCR amplification efficiency of the assay. We considered  
219 variation in standard preparation a possibility, given that RT-qPCR plates were prepared by  
220 multiple analysts, with new serial dilutions of the standard prepared for each plate. To account  
221 for this potential variability and reduce any resulting noise in the data, we elected to apply a  
222 pooled standard curve to calculate N1 concentrations of all samples. The pooled standard curve  
223 was developed by combining data of standard curves from 56 plates (samples from September 8,  
224 2020 to April 11, 2021); standard curves were pooled after the concentration adjustments of each  
225 lot of the RNA control described above were performed. The resulting pooled standard curve had  
226 a slope = -3.52, PCR efficiency = 92% (with 95% confidence interval of 91% to 94%), y-  
227 intercept = 41.01, and  $R^2 = 0.99$ . A comparison of N1 concentrations measured for the Wards  
228 Island facility using (a) individual and (b) pooled standard curves (Figure S.1) demonstrates how  
229 this approach addresses variability due to errors during standard curve preparation without  
230 affecting general trends in the data.

231

232

233

234

235

236

a. Individual RT-qPCR Standard Curves

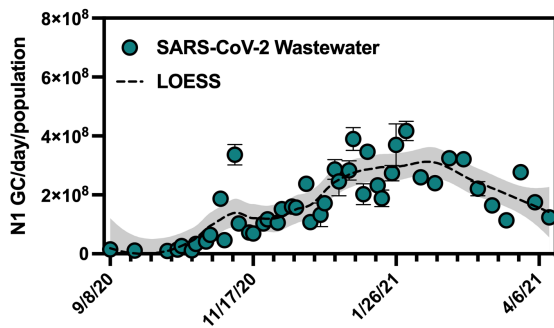

b. Pooled RT-qPCR Standard Curve

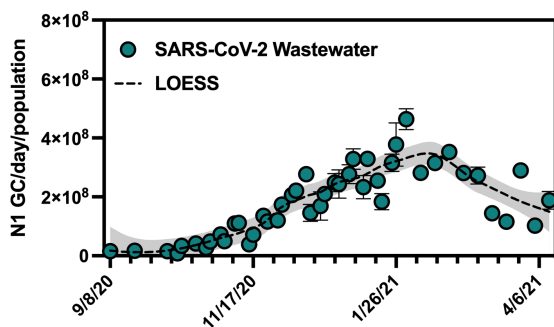

237

238 **Figure S.1. SARS-CoV-2 viral loads in wastewater from the Wards Island facility**  
239 **calculated using (a) the individual standard curves associated with the RT-qPCR plate on**  
240 **which each sample was run and (b) the pooled standard curve.**

241 Influent SARS-CoV-2 viral loads were normalized by the sewershed population. Error bars  
242 indicate standard deviations from triplicate RT-qPCR reactions as well as standard deviations of  
243 duplicate samples, where applicable. The dashed black line represents a LOESS fit (span = 0.4),  
244 with the 95% confidence intervals shaded in grey.

245  
246

### 247 *B*CoV Assay

248 A one-step RT-qPCR assay adapted from previously published assays<sup>2,8,9</sup> targeting the  
249 transmembrane (M) gene of BCoV was used to assess recovery of the process control (primers  
250 and probes purchased from Integrated DNA Technologies). Triplicate 20  $\mu$ L reactions each  
251 contained 5  $\mu$ L of TaqPath 1-Step RT-qPCR Master Mix (4x, ThermoFisher), 1.5  $\mu$ L of the  
252 primer/probe mix containing 5  $\mu$ M forward primer (5'- CTGGAAGTTGGTGGAGTT-3'), 5  $\mu$ M  
253 reverse primer (5'- ATTATCGGCCTAACATACATC-3'), and 2.5  $\mu$ M probe (5'-FAM-  
254 CCTTCATAT/Zen/CTATACACATCAAGTTGTT/3IABkFQ-3'), 5  $\mu$ L of template RNA, and  
255 8.5  $\mu$ L of nuclease-free water. Each PCR plate included triplicate no template controls (nuclease-  
256 free water). A custom gBlocks gene fragments oligo (Integrated DNA Technologies) (5'-

257 GTATCAGGTTGTTTATTAGAACTGGAAGTTGGTGGAGTTTCAACCCAGAAACAAACA  
258 ACTTGATGTGTATAGATATGAAGGGAAGGATGTATGTTAGGCCGATAATTGAGGAC  
259 TACCATACCCTTA-3') served as both the positive control and standard used in a decimal serial  
260 dilution for quantification of gene copies. RT-qPCR analysis was conducted on a StepOnePlus  
261 Real-Time PCR System (ThermoFisher) with the following cycling conditions: hold at 25 °C for  
262 2 min, 50 °C for 15 min, and 95 °C for 12 min, followed by 45 cycles of 95 °C for 3 sec, 55 °C  
263 for 30 sec, and 60 °C for 1 min.

264

265 Relative standard deviations (*RSD*) of both N1 concentrations and BCoV target concentrations  
266 for duplicate samples were calculated using equation S1, where  $SD_{GC}$  is the standard deviation  
267 and  $AVG_{GC}$  is the average gene copy concentration from duplicate samples, each with triplicate  
268 RT-qPCR reactions.

$$269 \quad RSD = \frac{SD_{GC}}{AVG_{GC}} \times 100\% \quad \text{Equation S1}$$

270 In general, the relative standard deviation for concentrations of the BCoV target were not  
271 consistent with those of the N1 target in a given sample, indicating that quantified recovery of  
272 the BCoV control inoculated into samples before virus concentrations and extraction may not  
273 accurately reflect recovery of SARS-CoV-2. Limitations of using proxy control viruses have  
274 been discussed elsewhere.<sup>10</sup> Calculated recoveries based on the known concentration of the  
275 BCoV control spike were therefore not used to adjust N1 gene copy concentrations. However, if  
276 the BCoV control was not recovered in any sample for which N1 was also not detected, that  
277 sample was flagged for failed processing and was excluded from trend analysis or, when  
278 possible, full analysis starting from pasteurization was repeated. If the BCoV control was  
279 detected in a sample, any non-detect wells from the N1 target assay for that sample were  
280 assigned a concentration of zero, which was used in calculating the reported average  
281 concentration from triplicate wells.

282

## 283 **Publicly Available Clinical COVID-19 Data and Hospitalization Data**

284

285 Figure S.2. summarizes the COVID-19 clinical testing data set obtained from publicly available  
286 data provided by the NYC Department of Health and Mental Hygiene (DOHMH). Figure S.2.  
287 includes, for each sewershed, the 7-day average of (1) the percentage of positive clinical  
288 COVID-19 tests, (2) new cases/day, and (3) tests/day for the past 7 days. Note that the  
289 percentage of positive clinical COVID-19 tests calculated as described in the main text, using the  
290 “last7days-by-modzcta.csv” data set, differs from the percent positivity calculated by NYC  
291 DOHMH in publicly available data sets such as “percentpositive-by-modzcta.csv”, which  
292 accounts for duplication related to an individual being tested more than once during a 7-day  
293 period.<sup>11</sup> The percentage of positive clinical COVID-19 tests we calculated for this analysis was  
294 used only for an estimate of adequate testing (i.e., for filtering the combined data set to remove  
295 data for dates with percentages of positive molecular tests (7-day average) that exceeded 10%)  
296 and not for direct comparison to the wastewater data. Data from March 15, 2021 - March 21,  
297 2021 were omitted due to technical issues related to data transmission. COVID-19 case data used  
298 in correlation and linear regression analyses were not normalized by population.

299

300 Figure S.3 summarizes borough-level hospitalizations from the NYC DOHMH’s publicly  
301 available “hosp-by-day.csv” file.<sup>11</sup> Borough populations were based on MODZCTA-level  
302 population estimates from the NYC DOHMH’s NYC Coronavirus Disease 2019 (COVID-19)  
303 Data.<sup>11</sup> Detailed information for the publicly available datasets was retrieved from:

304 <https://github.com/nychealth/coronavirus-data>.

305

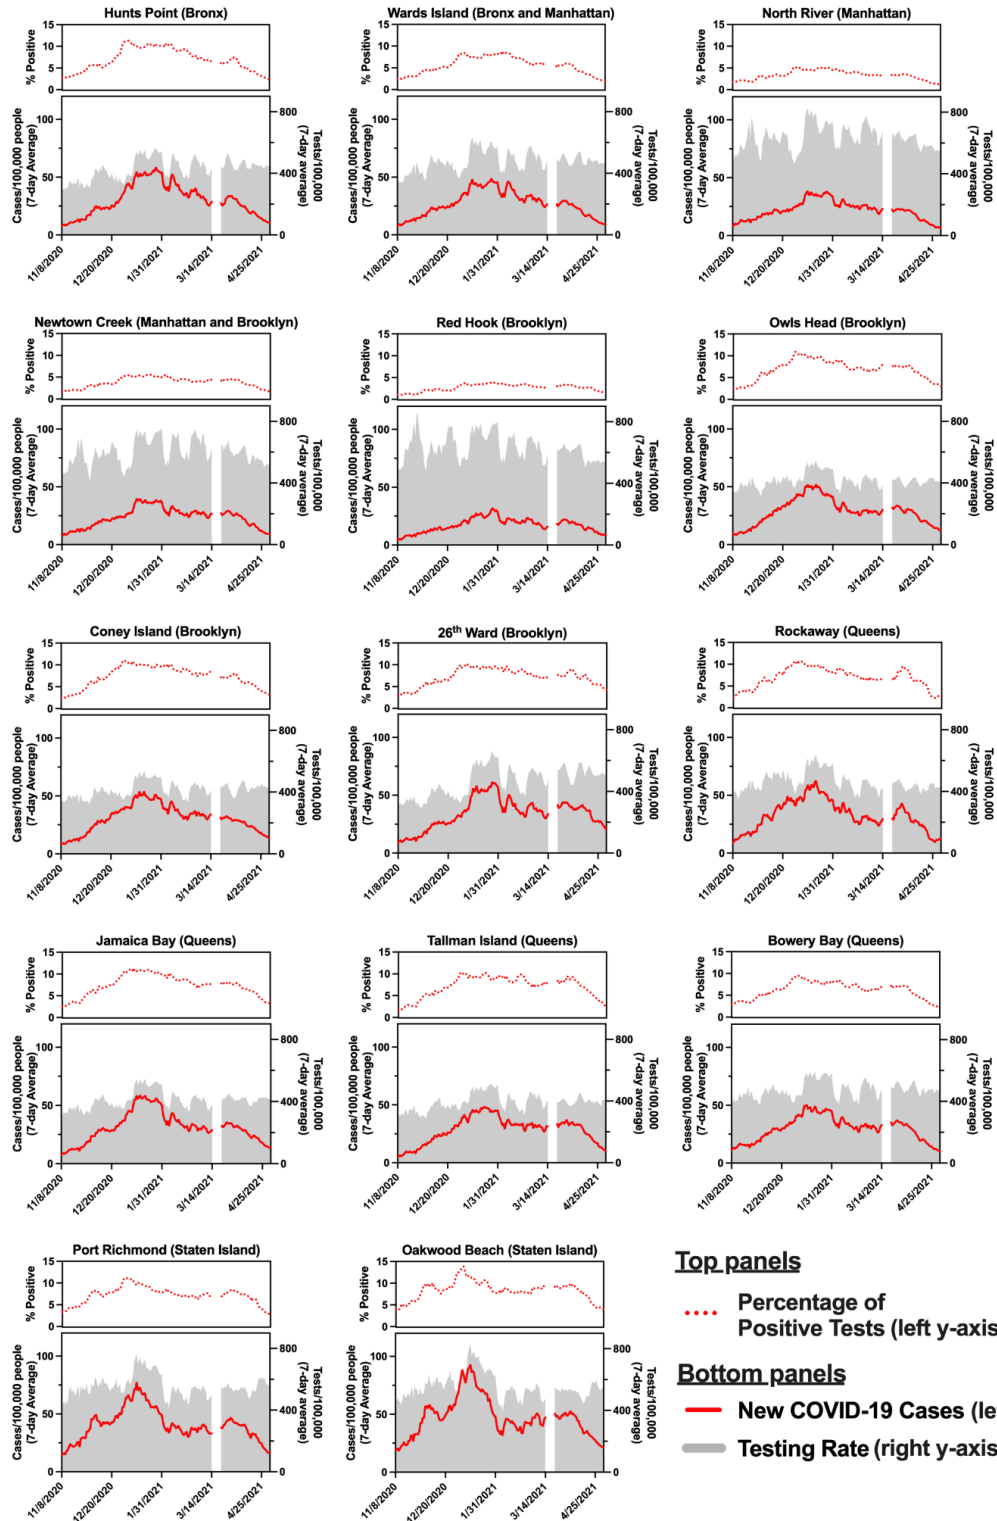

306  
307  
308  
309

**Figure S.2. Summary of COVID-19 testing data (molecular tests) for each sewershed in New York City.**



310 Figure S.2. *caption continued from previous page.* For each sewershed, top panels: 7-day  
 311 average of the percentage of positive clinical COVID-19 tests for the past 7 days. Bottom panels:  
 312 7-day average of new cases/day for the past 7 days (left y-axes) and 7-day average of tests/day  
 313 for the past 7 days (right y-axes), both normalized by the estimated sewershed population. Note  
 314 that the left and right y-axes in the bottom panels have different scales. Data used for correlation  
 315 analysis described in the main manuscript text is shown (November 8, 2020 to May 2, 2021).  
 316  
 317

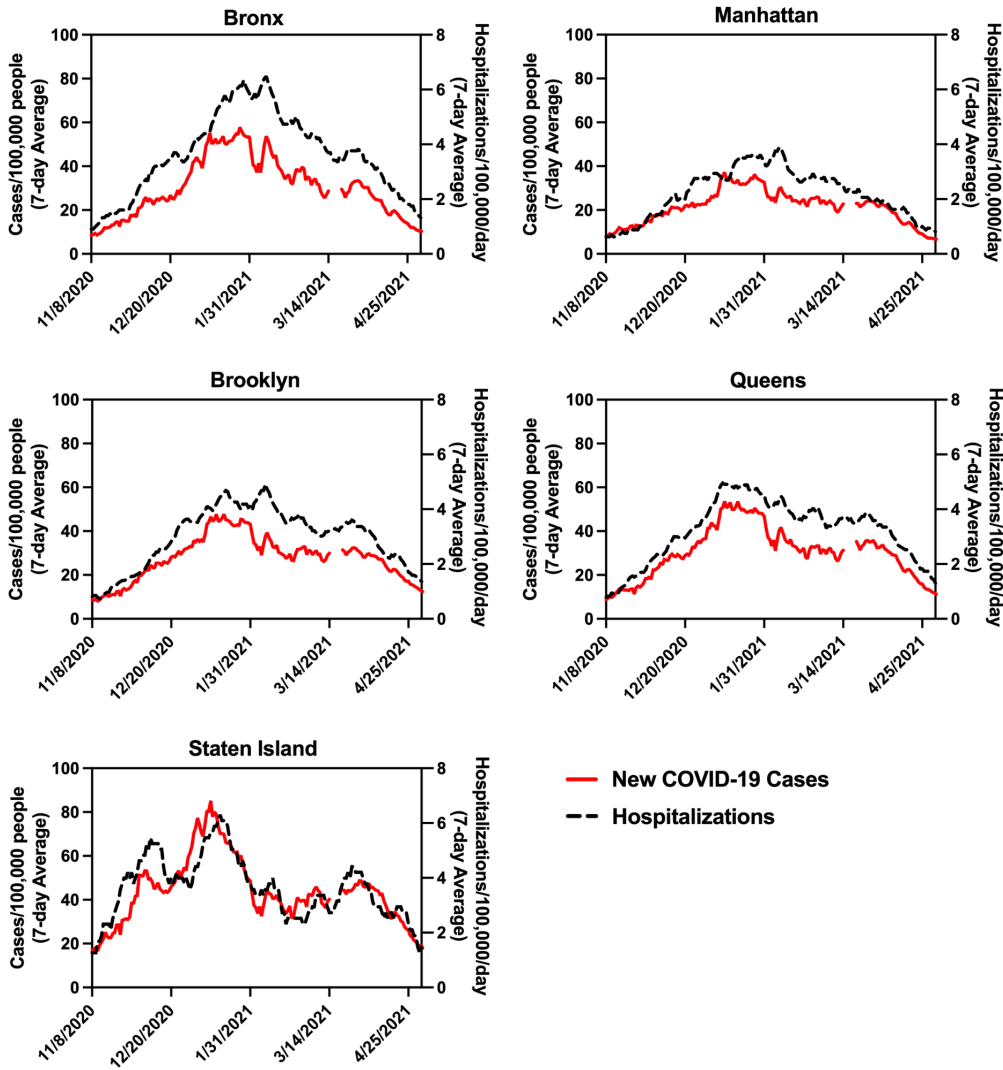

318  
 319 **Figure S.3. Summary of 7-day averages of new cases (solid red line) and hospitalizations**  
 320 **(dashed black line) normalized by borough population for each New York City borough for**  
 321 **the study period.**  
 322 Data is organized by the last date in the 7-day period for which average was calculated. Note that  
 323 the left and right y-axes have different scales.

324 **Sewershed-level Spearman’s Rank Correlation Coefficients**

325 **Table S.3. Spearman’s rank correlation coefficients ( $\rho$ ) between SARS-CoV-2 wastewater**  
 326 **data and clinical COVID-19 case data for each sewershed in New York City.**

327 Column 1: Coefficients for correlations between SARS-CoV-2 *viral loads* in wastewater (N1  
 328 GC/day) and 7-day averages of new COVID-19 cases/day, as described in the main manuscript  
 329 text. Column 2: Coefficients for correlations between SARS-CoV-2 *concentrations* in  
 330 wastewater (N1 GC/L) and 7-day averages of new COVID-19 cases/day normalized by  
 331 sewershed populations. The alternative analysis presented in column 2 was used to assess any  
 332 differences in correlation strengths due to flow normalization of wastewater data (i.e., to  
 333 calculate viral loads, column 1). Significance levels: \*p < 0.05, \*\*p < 0.01, \*\*\*p < 0.001,  
 334 \*\*\*\*p < 0.0001.  
 335

|                                           | <b>Column 1</b>                           | <b>Column 2</b>                            |
|-------------------------------------------|-------------------------------------------|--------------------------------------------|
| <b>Data used for correlation analysis</b> | <b>SARS-CoV-2 Viral Loads (N1 GC/day)</b> | <b>SARS-CoV-2 Concentrations (N1 GC/L)</b> |
|                                           | <b>New COVID-19 cases/day</b>             | <b>New COVID-19 cases/day/100,000</b>      |
| Hunts Point                               | 0.60***                                   | 0.54***                                    |
| Wards Island                              | 0.81****                                  | 0.80****                                   |
| North River                               | 0.52**                                    | 0.49**                                     |
| Newtown Creek                             | 0.55***                                   | 0.52**                                     |
| Red Hook                                  | 0.55***                                   | 0.51**                                     |
| Owls Head                                 | 0.59***                                   | 0.56***                                    |
| Coney Island                              | 0.38*                                     | 0.39*                                      |
| 26th Ward                                 | 0.64****                                  | 0.59***                                    |
| Rockaway                                  | 0.68****                                  | 0.66****                                   |
| Jamaica Bay                               | 0.49**                                    | 0.54***                                    |
| Tallman Island                            | 0.55***                                   | 0.52**                                     |
| Bowery Bay                                | 0.46**                                    | 0.38*                                      |
| Port Richmond                             | 0.48**                                    | 0.38*                                      |
| Oakwood Beach                             | 0.40*                                     | 0.41*                                      |

336 **Time Lag Analysis**

337

338 To assess whether SARS-CoV-2 viral loads (N1 GC/day) measured in wastewater were a leading  
339 indicator for 7-day averages of new COVID-19 cases/day, Spearman's rank correlation  
340 coefficients between the two for lag times ranging from 0-21 days for each sewershed were  
341 assessed (Figure S.4). The time lag represents the number of days the clinical data was shifted  
342 back in time in relation to the date of wastewater sample collection. The optimal lag time (i.e.,  
343 the number of days the clinical data lagged behind the wastewater data to result in the strongest  
344 correlation) varied for each sewershed, with minimal improvement in correlations associated  
345 with a lag time (Figure S.4). No significant correlations were found between the optimal lag time  
346 and the average testing rate for the study period for any sewersheds.

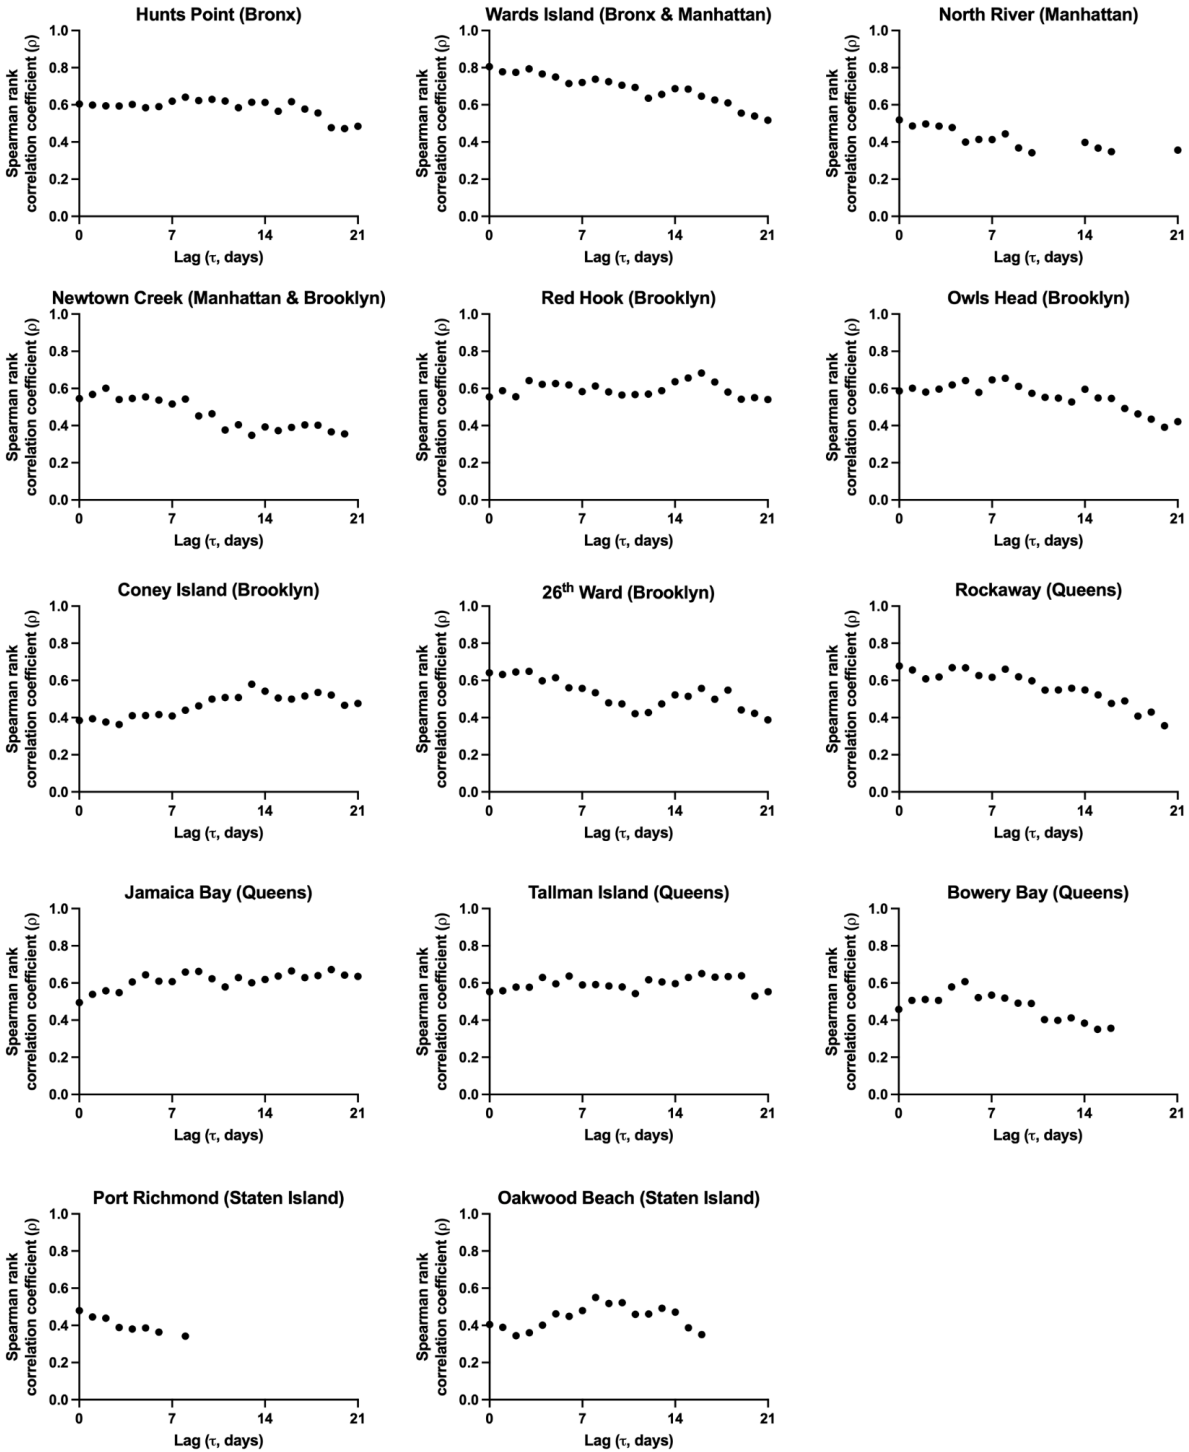

347

348 **Figure S.4. Spearman rank correlation coefficients ( $\rho$ ) between SARS-CoV-2 viral loads**  
 349 **(N1 GC/day) and 7-day averages of new COVID-19 cases/day, with a time lag ( $\tau$ ) between 0**  
 350 **and 21 days for each sewershed in New York City.**

351 The time lag represents the number of days the clinical data was shifted back in time.  
 352 Correlations that were not statistically significant ( $p > 0.05$ ) have been omitted.

353 **Linear Regression Analysis**

354 Assessment of linear regressions presented in Figures 2 and 3 in the main manuscript confirmed  
355 that (1) the slope between  $\log_{10}$ -transformed viral loads (N1 GC/day) and  $\log_{10}$ -transformed new  
356 cases/day was significantly different from zero (F test; the assumption of significantly non-zero  
357 slopes held true for both the combined data set and all facilities individually, with the exception  
358 of Port Richmond), (2) a significant linear relationship was present (Pearson,  $p < 0.05$ ; the  
359 assumption of significant linear relationships held true for both the combined data set and all  
360 facilities individually, with the exception of Port Richmond), (3) there were no clear patterns  
361 observed in residuals (though exceptions were made for some outliers which we elected to retain  
362 in the data), and (4) residuals were normally distributed based on the Shapiro-Wilks test ( $\alpha =$   
363  $0.05$ ) considered alongside visual inspection of histograms and quantile-quantile plots. Note that  
364 linear regressions were performed using  $\log_{10}$ -transformed data; linear regressions with raw,  
365 untransformed data generally resulted in fits with lower  $R^2$  values and more frequent cases of  
366 residuals that were not normally distributed than did regressions with the  $\log_{10}$ -transformed  
367 transformed data set.

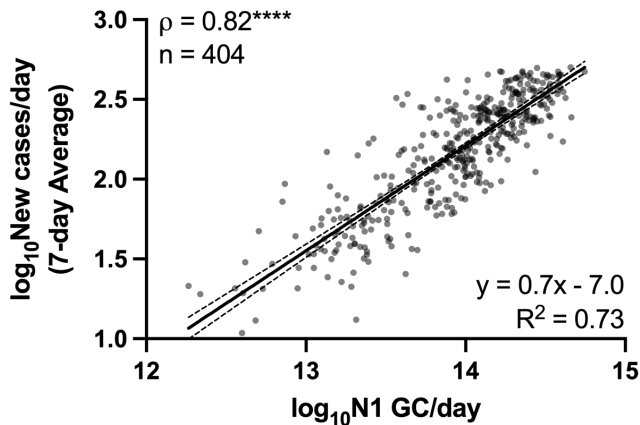

368

369 **Figure S.5. Linear regression of  $\log_{10}$ -transformed flow-normalized SARS-CoV-2 viral**  
370 **loads in wastewater (N1 GC/day) and  $\log_{10}$ -transformed 7-day averages of new COVID-19**  
371 **cases/day for the combined data set without the data filtered based on potentially**  
372 **inadequate testing.**

373 This figure is presented for comparison to Figure 3 in the main text, which excludes data  
374 collected on dates with over 10% positive testing results. The linear regression (solid line) and  
375 associated 95% confidence intervals (dashed lines) are shown along with the goodness of fit  $R^2$   
376 value. The Spearman's rank correlation coefficient ( $\rho$ ) between N1 GC/day and new COVID-19  
377 cases/day is shown at the top left, with the significance level indicated ( $****p < 0.0001$ ).

378 **Estimation of Minimum Detectable Case Rates**

379

380 Table S.4 summarizes the estimated minimum number of cases per day per 100,000 people in  
381 each sewershed required to detect N1 in influent wastewater based on the method LOD.

382 Estimates were calculated using both individual linear regressions for each WRRF and the linear  
383 regression for the combined data set using Equations 3 and 4 in the main text. To assess whether  
384 the estimates calculated based on SARS-CoV-2 viral loads differed from those obtained using  
385 SARS-CoV-2 concentrations without flow normalization, estimates were also determined using  
386 linear regressions of N1 concentrations in wastewater (N1 GC/L) and new COVID-19  
387 cases/day/100,000. The same range of estimates (2 - 8 cases/day/100,000) was obtained from  
388 linear regressions using both pairs of data sets.

389

390 **Table S.4. Estimated minimum detectable case rates (new COVID-19 cases/day/100,000)**  
 391 **associated with method LOD for quantification of the SARS-CoV-2 N1 gene target in**  
 392 **wastewater (4,500 N1 GC/L) for each sewershed.**

393 The Oakwood Beach and Port Richmond sewersheds were excluded from analysis, as described in the main text, but  
 394 information for all sewersheds is included here for completeness.

| Sewershed (WRRF) | New COVID-19 cases/day/100,000 associated with method LOD           |                                     |          |                                                                                        |                                |                                   |
|------------------|---------------------------------------------------------------------|-------------------------------------|----------|----------------------------------------------------------------------------------------|--------------------------------|-----------------------------------|
|                  | Based on linear regressions of N1 GC/day and new COVID-19 cases/day |                                     |          | Based on linear regressions of N1 GC/L and new COVID-19 cases/day/100,000 <sup>†</sup> |                                |                                   |
|                  | Sewershed-specific regressions                                      | Regressions from combined data set* |          |                                                                                        | Sewershed-specific regressions | Regression from combined data set |
|                  |                                                                     | (a) all data                        | (b) rise | (c) decline                                                                            |                                |                                   |
| Hunts Point      | 5                                                                   | 2                                   | 2        | 3                                                                                      | 5                              | 5                                 |
| Wards Island     | 2                                                                   | 2                                   | 2        | 2                                                                                      | 2                              |                                   |
| North River      | 8                                                                   | 2                                   | 2        | 2                                                                                      | 8                              |                                   |
| Newtown Creek    | 4                                                                   | 2                                   | 2        | 2                                                                                      | 5                              |                                   |
| Red Hook         | 3                                                                   | 2                                   | 2        | 3                                                                                      | 4                              |                                   |
| Owls Head        | 3                                                                   | 2                                   | 2        | 2                                                                                      | 3                              |                                   |
| Coney Island     | 6                                                                   | 2                                   | 2        | 2                                                                                      | 6                              |                                   |
| 26th Ward        | 5                                                                   | 3                                   | 4        | 4                                                                                      | 5                              |                                   |
| Rockaway         | 8                                                                   | 4                                   | 4        | 5                                                                                      | 8                              |                                   |
| Jamaica Bay      | 2                                                                   | 2                                   | 2        | 2                                                                                      | 3                              |                                   |
| Tallman Island   | 2                                                                   | 3                                   | 3        | 3                                                                                      | 3                              |                                   |
| Bowery Bay       | 8                                                                   | 2                                   | 2        | 2                                                                                      | NA <sup>‡</sup>                |                                   |
| Port Richmond    | NA <sup>‡</sup>                                                     | 3                                   | 3        | 3                                                                                      | NA <sup>‡</sup>                |                                   |
| Oakwood Beach    | 20                                                                  | 3                                   | 3        | 3                                                                                      | 21                             |                                   |

395 \*Linear regressions were determined using (a) “all data”: all data from the combined data set, (b) “rise”: data from  
 396 the combined data set associated with the rise in case rates (data prior to January 2021), or (c) “decline”: data from  
 397 the combined data set associated with the decline in case rates (data after January 2021). Note that the combined  
 398 data set does not include data from Port Richmond or Oakwood Beach and has been filtered to exclude data  
 399 associated with over 10% positive tests.

400 <sup>†</sup>Estimates from these regressions are not flow-dependent; therefore, only one estimate is determined from the  
 401 combined data set.

402 <sup>‡</sup>Slope of associated linear regression not significantly non-zero; linear regression rejected and case rate estimate not  
 403 calculated

404 Figure S.6 illustrates graphically the approach used to estimate the equivalent number of  
 405 COVID-19 cases/day/100,000 people associated with the SARS-CoV-2 quantification method  
 406 LOD using linear regression for the combined data set. First, the method LOD was converted to  
 407 a SARS-CoV-2 viral loading rate in wastewater (in units of N1 GC/day) for each sewershed  
 408 using Equation 3 in the main text. The average daily flow rate for each WRRF ( $Q_{avg}$ ) ranged  
 409 from 21 MGD (Rockaway WRRF) to 188 MGD (Newtown Creek WRRF), resulting in a range  
 410 of LOD-equivalent viral loads between  $3.5 \times 10^{11}$  to  $3.2 \times 10^{12}$  N1 GC/day across the facilities.  
 411 The estimated minimum new COVID-19 cases/day required to detect SARS-CoV-2 in  
 412 wastewater influent were determined by inputting this viral load into Equation 4 (main text) with  
 413 the slope ( $m$ ) and y-intercept ( $b$ ) values from the linear regression (Figure S.6). The resulting  
 414 COVID-19 cases/day (ranging from 4 to 17 new cases/day) were then normalized by the  
 415 respective sewershed populations to obtain estimates ranging from 2 to 4 new COVID-19  
 416 cases/day/100,000. The same approach was applied for each sewershed-level linear regression.  
 417

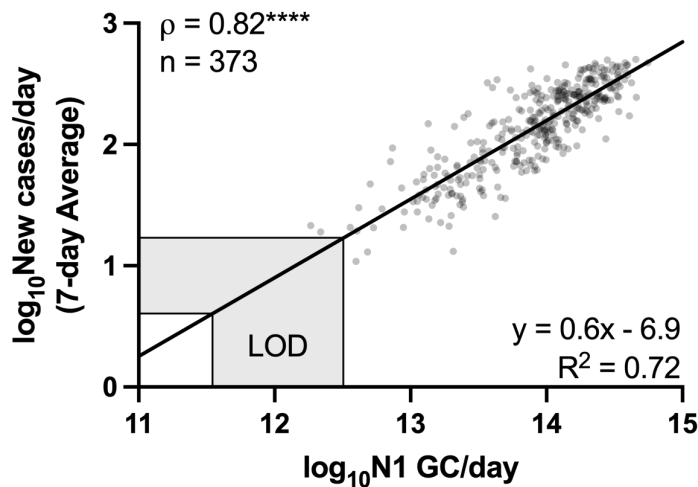

418

419 **Figure S.6. Estimation of new COVID-19 cases/day associated with the method LOD for**  
 420 **quantification of the SARS-CoV-2 N1 gene target in wastewater, based on the linear**  
 421 **regression of  $\log_{10}$ -transformed SARS-CoV-2 viral loads (N1 GC/day) and  $\log_{10}$ -**  
 422 **transformed 7-day averages of new COVID-19 cases/day for the combined data set**  
 423 **(modified from Figure 3.a).**

424 The method LOD (in units of N1 GC/day) for the range of average flow rates (21 MGD at  
 425 Rockaway WRRF - 188 MGD at Newtown Creek WRRF) for all facilities is indicated in the  
 426 shaded grey region along the x-axis. The associated minimum detectable new COVID-19  
 427 cases/day is indicated in the shaded grey region along the y-axis. Estimates from this approach  
 428 were normalized by sewershed populations.



429 **References**

- 430 1 2050 SED Forecasts, <https://www.nymtc.org/DATA-AND-MODELING/SED->  
431 Forecasts/2050-Forecasts, (accessed 12 April 2021).
- 432 2 S. Feng, A. Roguet, J. S. McClary-Gutierrez, R. J. Newton, N. Kloczko, J. G. Meiman and S.  
433 L. McLellan, Evaluation of Sampling, Analysis, and Normalization Methods for SARS-CoV-  
434 2 Concentrations in Wastewater to Assess COVID-19 Burdens in Wisconsin Communities,  
435 *ACS EST Water*, 2021, **1**, 1955–1965.
- 436 3 X. Lu, L. Wang, S. K. Sakthivel, B. Whitaker, J. Murray, S. Kamili, B. Lynch, L. Malapati, S.  
437 A. Burke, J. Harcourt, A. Tamin, N. J. Thornburg, J. M. Villanueva and S. Lindstrom, US  
438 CDC Real-Time Reverse Transcription PCR Panel for Detection of Severe Acute Respiratory  
439 Syndrome Coronavirus 2, *Emerg Infect Dis*, 2020, **26**, 1654–1665.
- 440 4 Centers for Disease Control and Prevention, Division of Viral Diseases, CDC 2019-Novel  
441 Coronavirus (2019-nCoV) Real-Time RT-PCR Diagnostic Panel: Instructions for Use, CDC-  
442 006-00019, Revision 06, 2020.
- 443 5 Division of Viral Diseases, National Center for Immunization and Respiratory Diseases,  
444 Centers for Disease Control and Prevention, Atlanta, GA, USA, 2019-Novel Coronavirus  
445 (2019-nCoV) Real-time rRT-PCR Panel Primers and Probes, 2020.
- 446 6 A. Forootan, R. Sjöback, J. Björkman, B. Sjögreen, L. Linz and M. Kubista, Methods to  
447 determine limit of detection and limit of quantification in quantitative real-time PCR (qPCR),  
448 *Biomol Detect Quantif*, 2017, **12**, 1–6.
- 449 7 S. A. Bustin, V. Benes, J. A. Garson, J. Hellemans, J. Huggett, M. Kubista, R. Mueller, T.  
450 Nolan, M. W. Pfaffl, G. L. Shipley, J. Vandesompele and C. T. Wittwer, The MIQE  
451 Guidelines: Minimum Information for Publication of Quantitative Real-Time PCR  
452 Experiments, *Clin Chem*, 2009, **55**, 611–622.
- 453 8 N. Decaro, G. Elia, M. Campolo, C. Desario, V. Mari, A. Radogna, M. L. Colaianni, F.  
454 Cirone, M. Tempesta and C. Buonavoglia, Detection of bovine coronavirus using a TaqMan-  
455 based real-time RT-PCR assay, *J Virol Methods*, 2008, **151**, 167–171.
- 456 9 S. Loeb, One-Step RT-ddPCR for Detection of SARS-CoV-2, Bovine Coronavirus, and  
457 PMMoV RNA in RNA Derived from Wastewater or Primary Settled Solids, *protocols.io*,  
458 2020, DOI:10.17504/protocols.io.bi6vkhe6.
- 459 10 R. S. Kantor, K. L. Nelson, H. D. Greenwald and L. C. Kennedy, Challenges in Measuring the  
460 Recovery of SARS-CoV-2 from Wastewater, *Environ. Sci. Technol.*, 2021, **55**, 3514–3519.
- 461 11 nychealth/coronavirus-data, <https://github.com/nychealth/coronavirus-data>, (accessed 20 May  
462 2021).
